# Supplementary material for: pH effects on plant calcium fluxes: lessons from acidification-mediated calcium elevation induced by the γ-glutamyl-leucine dipeptide identified from Phytophthora infestans
Source: PubMed Central journal article supplement (PMC6426842; doi:10.1038/s41598-019-41276-0), 2019-03-18
Supplement: 41598_2019_41276_MOESM1_ESM.pdf [file 41598_2019_41276_MOESM1_ESM.pdf]

# Supporting information

**pH effects on plant calcium fluxes: lessons from acidification-mediated calcium elevation induced by the  $\gamma$ -glutamyl-leucine dipeptide identified from *Phytophthora infestans*.**

Lore Westphal, Nadine Strehmel, Lennart Eschen-Lippold, Nicole Bauer, Bernhard Westermann, Sabine Rosahl, Dierk Scheel, Justin Lee\*

\* Corresponding author: [jlee@ipb-halle.de](mailto:jlee@ipb-halle.de)

**Contains: 11 figures**

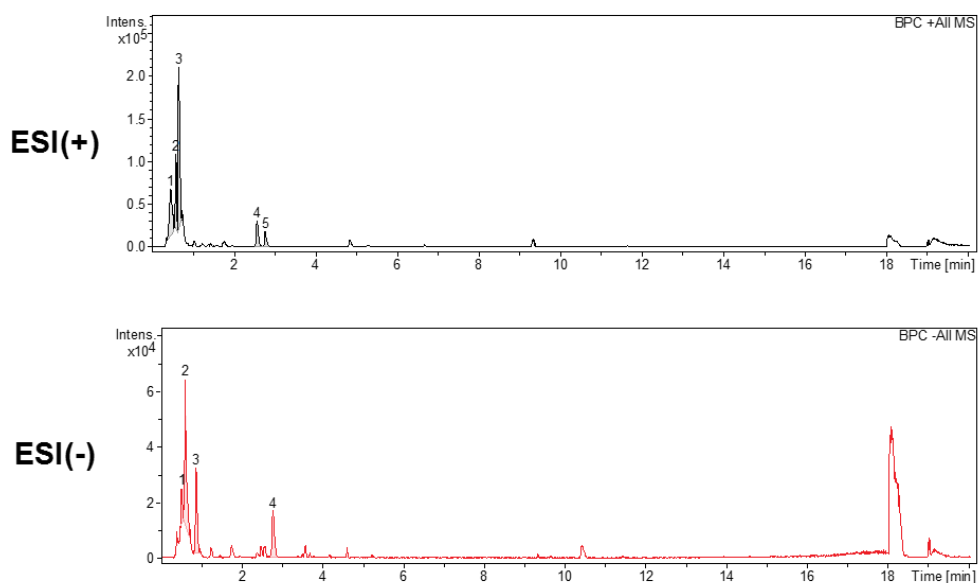

**S1 Fig. Representative base peak chromatograms of *P. infestans* medium as recorded by UPLC/ESI(+)-QTOFMS and UPLC/ESI(-)-QTOFMS. ESI(+): 1) trigonelline; 2) C<sub>9</sub>H<sub>17</sub>NO<sub>4</sub>; 3) tyrosine; 4)  $\gamma$ -Glu-Leu; 5) C<sub>9</sub>H<sub>10</sub>O<sub>5</sub> and ESI(-): 1) citric acid; 2) isocitric acid; 3) C<sub>14</sub>H<sub>18</sub>N<sub>2</sub>O<sub>6</sub>; 4) C<sub>16</sub>H<sub>22</sub>O<sub>10</sub>.**

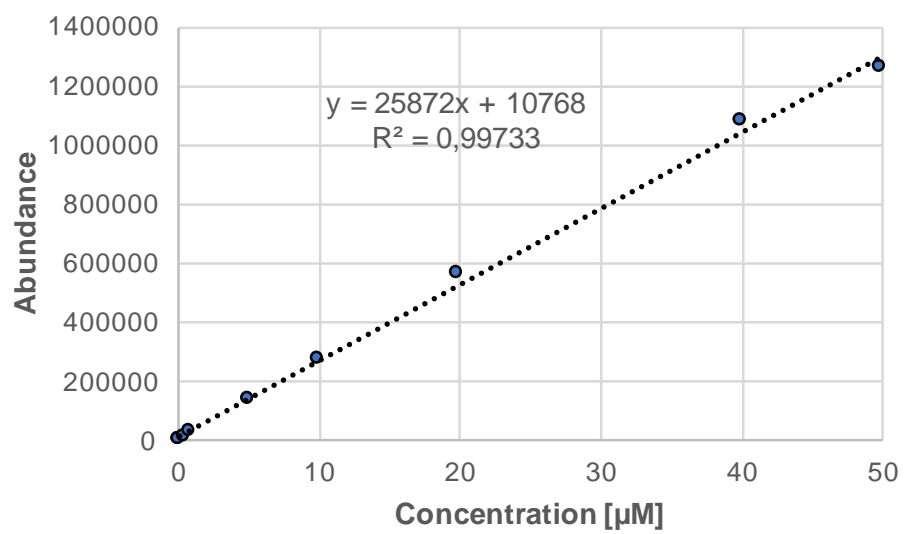

**S2 Fig. Quantitation of  $\gamma$ -Glu-Leu in mycelium extract of *P. infestans*.**

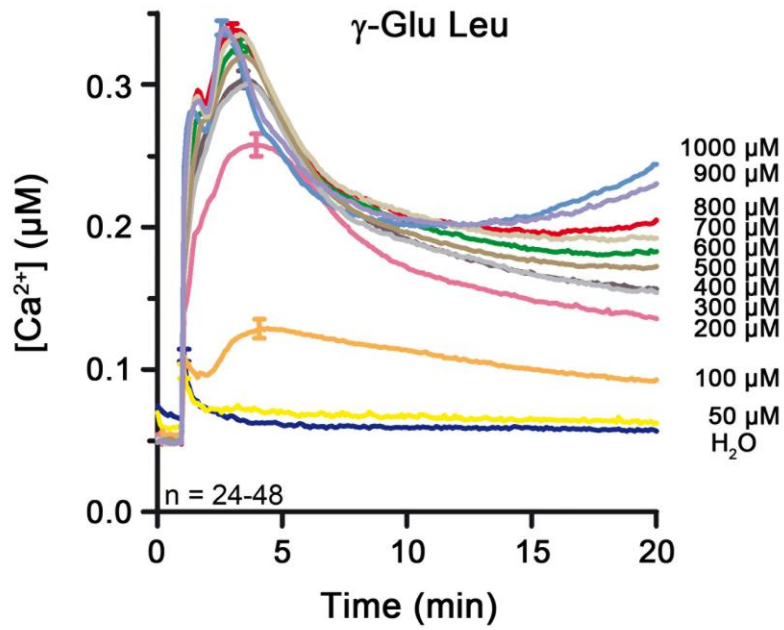

**S3 Fig.  $\gamma$ -Glu-Leu induces  $\text{Ca}^{2+}$  flux in Arabidopsis pMAQ2 in a concentration-dependent manner.** Seedlings were treated with water and aqueous solutions containing different concentrations of  $\gamma$ -Glu-Leu, respectively (two to four independent experiments per concentration). Error bars represent standard error of the mean.

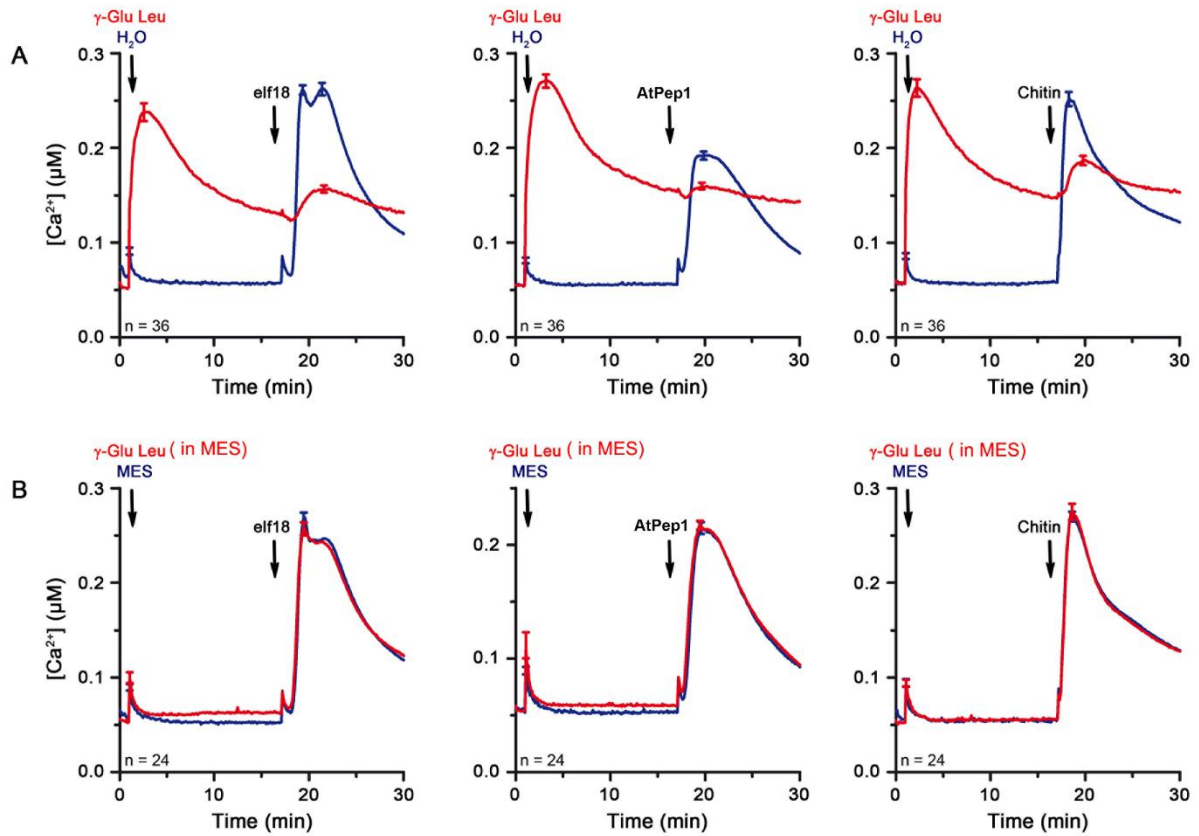

**S4 Fig.  $\gamma$ -Glu-Leu desensitizes pMAQ2 seedlings for subsequent treatments with elf18, AtPep1 and chitin when applied as aqueous solution, but not when dissolved in MES buffer (pH 6.0).** (A) Arabidopsis pMAQ2 seedlings were treated with water or an aqueous solution containing 500  $\mu M$   $\gamma$ -Glu-Leu approximately 15 min before the application of elf18 (1  $\mu M$ ), AtPep1 (1  $\mu M$ ) or chitin (200  $\mu g$  shrimp shell/ml). (B) Seedlings were treated with MES buffer (pH 6.0) or MES buffer containing 500  $\mu M$   $\gamma$ -Glu-Leu (pH 6.0) approximately 15 min before the application of elf18 (1  $\mu M$ ), AtPep1 (1  $\mu M$ ) or chitin (200  $\mu g$  shrimp shell/ml). Experiments were performed twice and the data of both experiments were pooled. Error bars represent standard error of the mean.

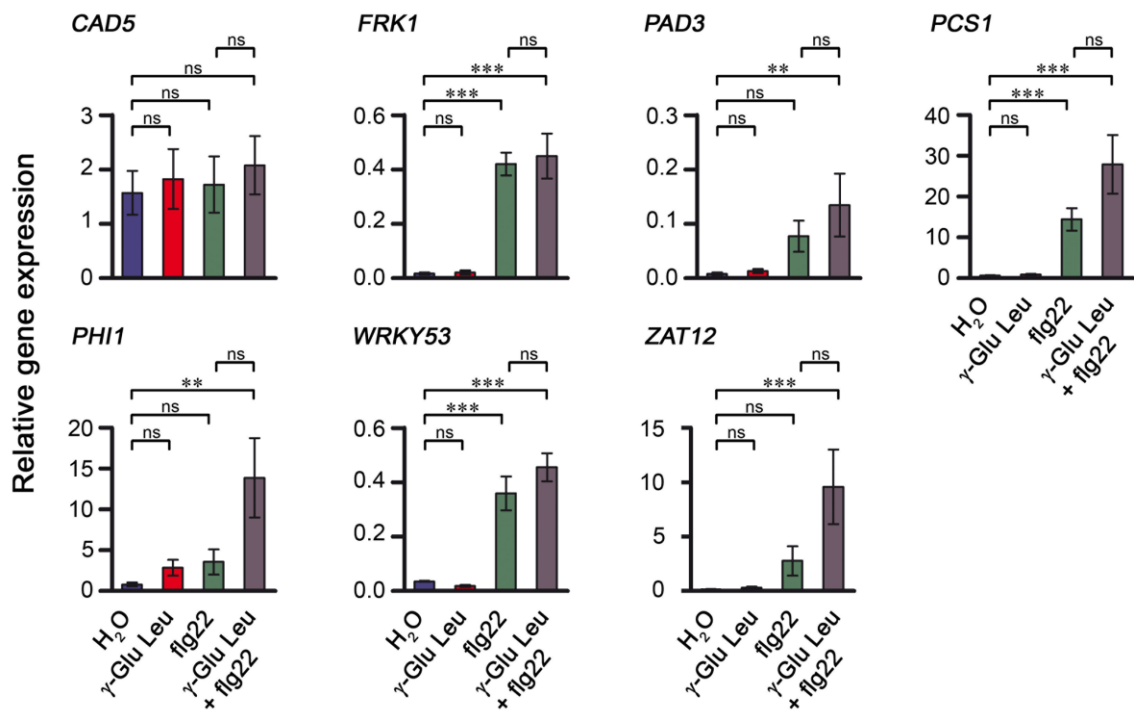

**S5 Fig. Co-treatment of Arabidopsis with  $\gamma$ -Glu-Leu and flg22 has no significant influence on the expression of *CAD5*, *FRK1*, *PAD3*, *PCS1*, *PHI1*, *WRKY53* and *ZAT12* in comparison to the flg22 treatment.** Pools of pMAQ2 seedlings were treated with water or an aqueous solution containing 10 nM flg22 and/or 500  $\mu$ M  $\gamma$ -Glu-Leu for 1 hour. Expression of defense genes (relative to *PP2AA3*) was determined in two independent experiments with 3-4 seedling pools per treatment and 2 technical replicates per pool. Combined data of both experiments were log-transformed prior to One-way ANOVA with Bonferroni multiple comparison tests. \*\*, \*\*\* = significant difference ( $P < 0.01$ ,  $0.001$ , respectively), ns: not significant.

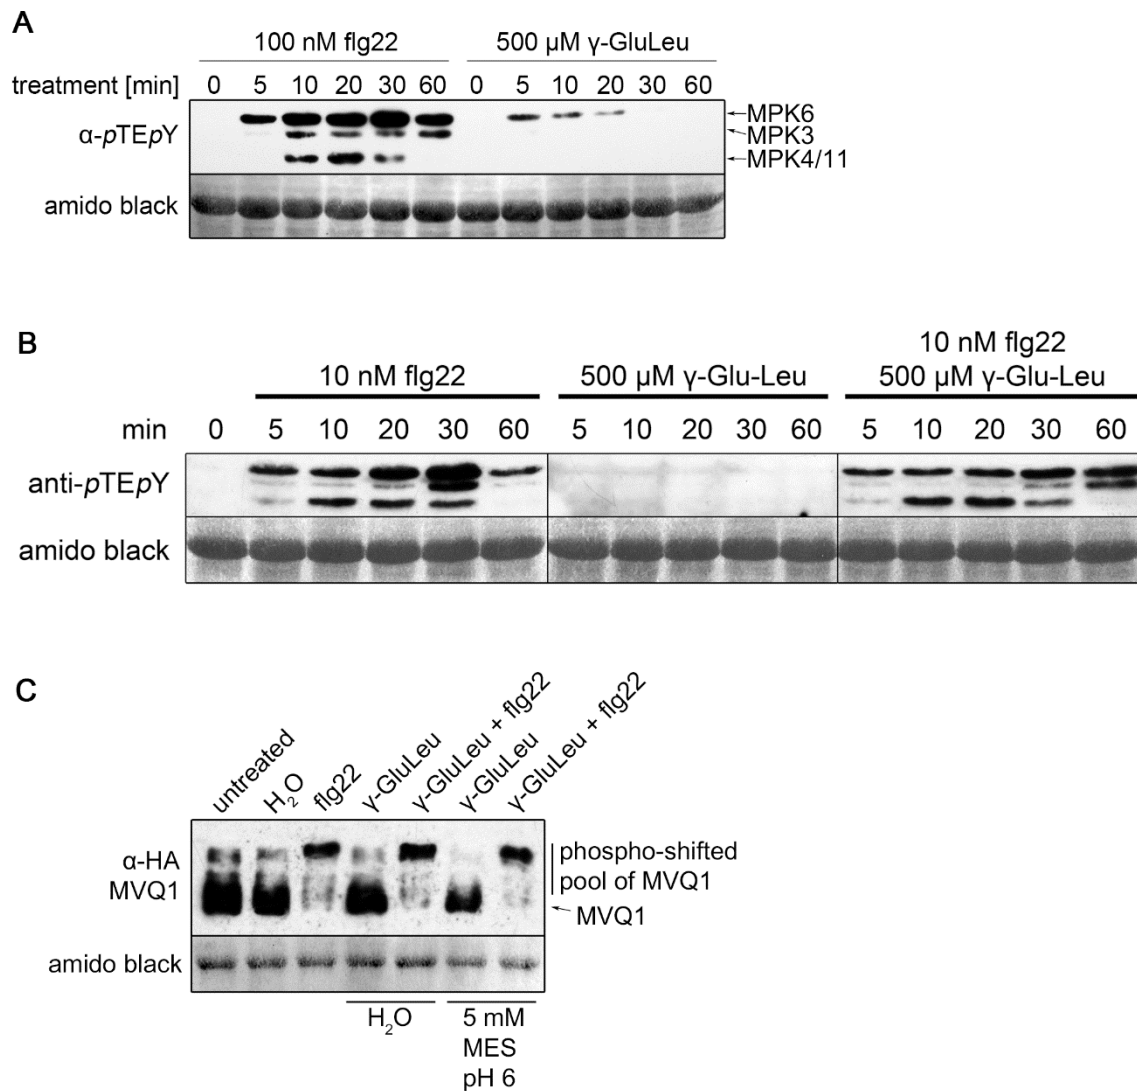

**S6 Fig.  $\gamma$ -Glu-Leu does not enhance MAPK activation or MPK6-dependent phosphorylation of MVQ1.** (A) pMAQ2 seedlings were grown in half strength MS-media and treated with 100 nM flg22 or 500  $\mu$ M  $\gamma$ -Glu-Leu for the indicated time points. Protein extracts were subjected to Western blot analysis using an antibody detecting phosphorylated (activated) MAPKs ( $\alpha$ -pTEpY). (B) Samples were generated as in (A), except with simultaneous co-treatment of 10 nM flg22 and 500  $\mu$ M  $\gamma$ -Glu-Leu. Note the weak MAPK phosphorylation by  $\gamma$ -Glu-Leu (as seen in A above) is not visible at this exposure of the western blot. (C) Col-0 protoplasts were transformed with an MVQ1-HA construct (Pecher et al. 2014). After 16 h, samples were treated for 1 h with H<sub>2</sub>O as a control, 100 nM flg22, 500  $\mu$ M  $\gamma$ -Glu-Leu or both solutions simultaneously in either water or buffered in MES (pH 6). Amido black staining of the membranes shows equal loading (large subunit of RuBisCO). For data transparency, the original uncropped blot images can be seen in Supplementary Figure S11.

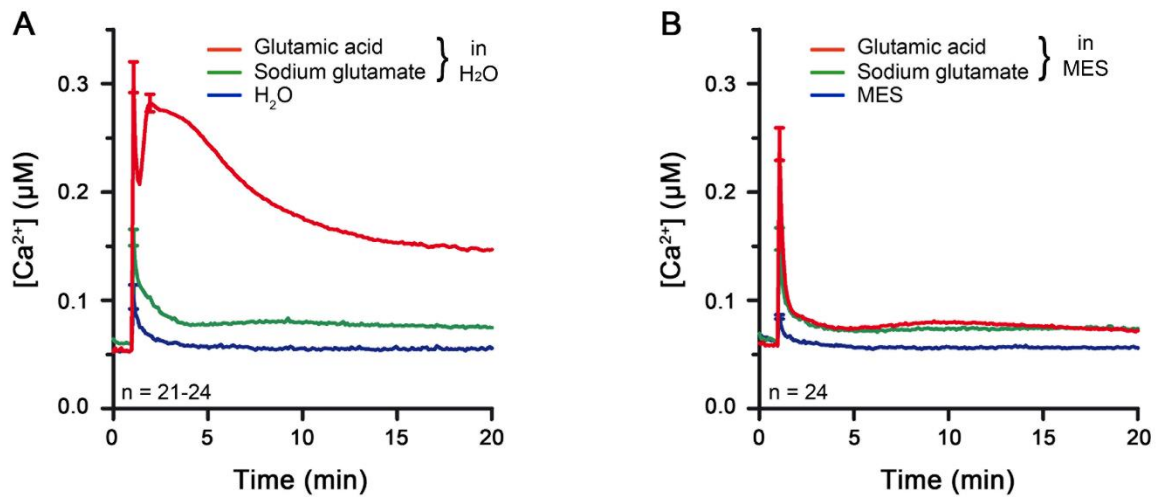

**S7 Fig. Unbuffered glutamic acid solution “overinflates” the actual  $Ca^{2+}$  response in pMAQ2 seedlings.** (A) Arabidopsis pMAQ2 seedlings were treated with water and aqueous solutions containing 1 mM Glutamic acid (as free acid) or as sodium salt. (B) Seedlings were treated with MES (pH 6.0) and MES solutions (pH 6.0) containing 1 mM Glutamic acid or Sodium glutamate. Experiments were performed twice and the data of both experiments were pooled. Error bars represent standard error of the mean.



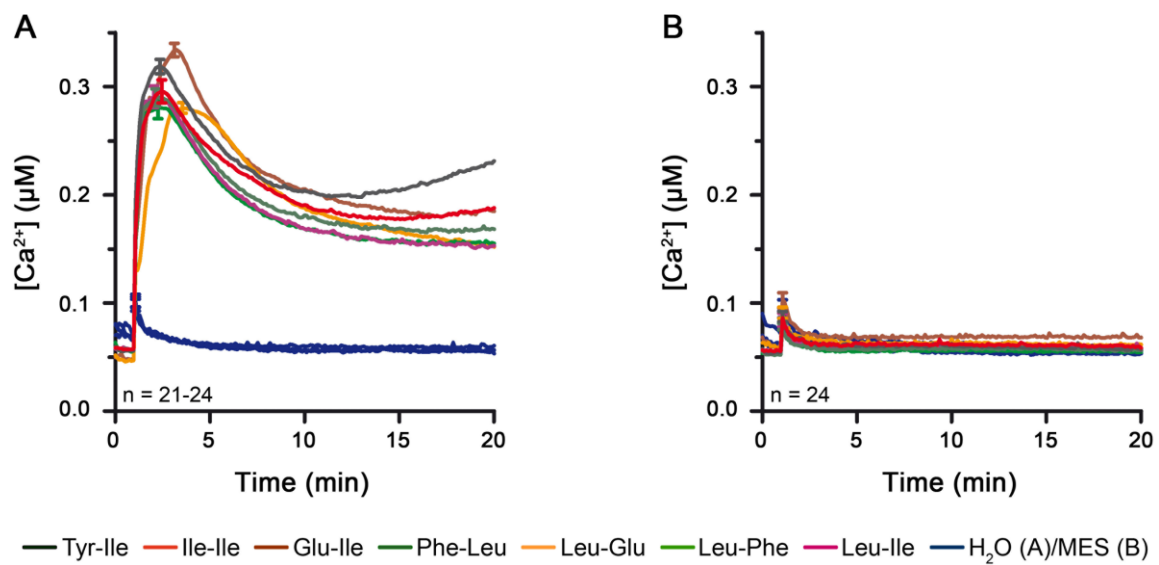

**S8 Fig. A variety of different dipeptides induce Ca<sup>2+</sup> flux in Arabidopsis pMAQ2 as aqueous solution but not when buffered with MES (pH 6.0).** (A) Seedlings were treated with water and aqueous solutions containing 500 µM of Tyr-Ile, Ile-Ile, Glu-Ile, Phe-Leu, Leu-Glu, Leu-Phe or Leu-Ile. (B) Seedlings were treated with MES (pH 6.0) and MES solutions containing 500 µM of Tyr-Ile, Ile-Ile, Glu-Ile, Phe-Leu, Leu-Glu, Leu-Phe or Leu-Ile (pH 6.0). [Ca<sup>2+</sup>]<sub>cyt</sub> curves are based on pooled data from two independent experiments. Error bars represent standard error of the mean.

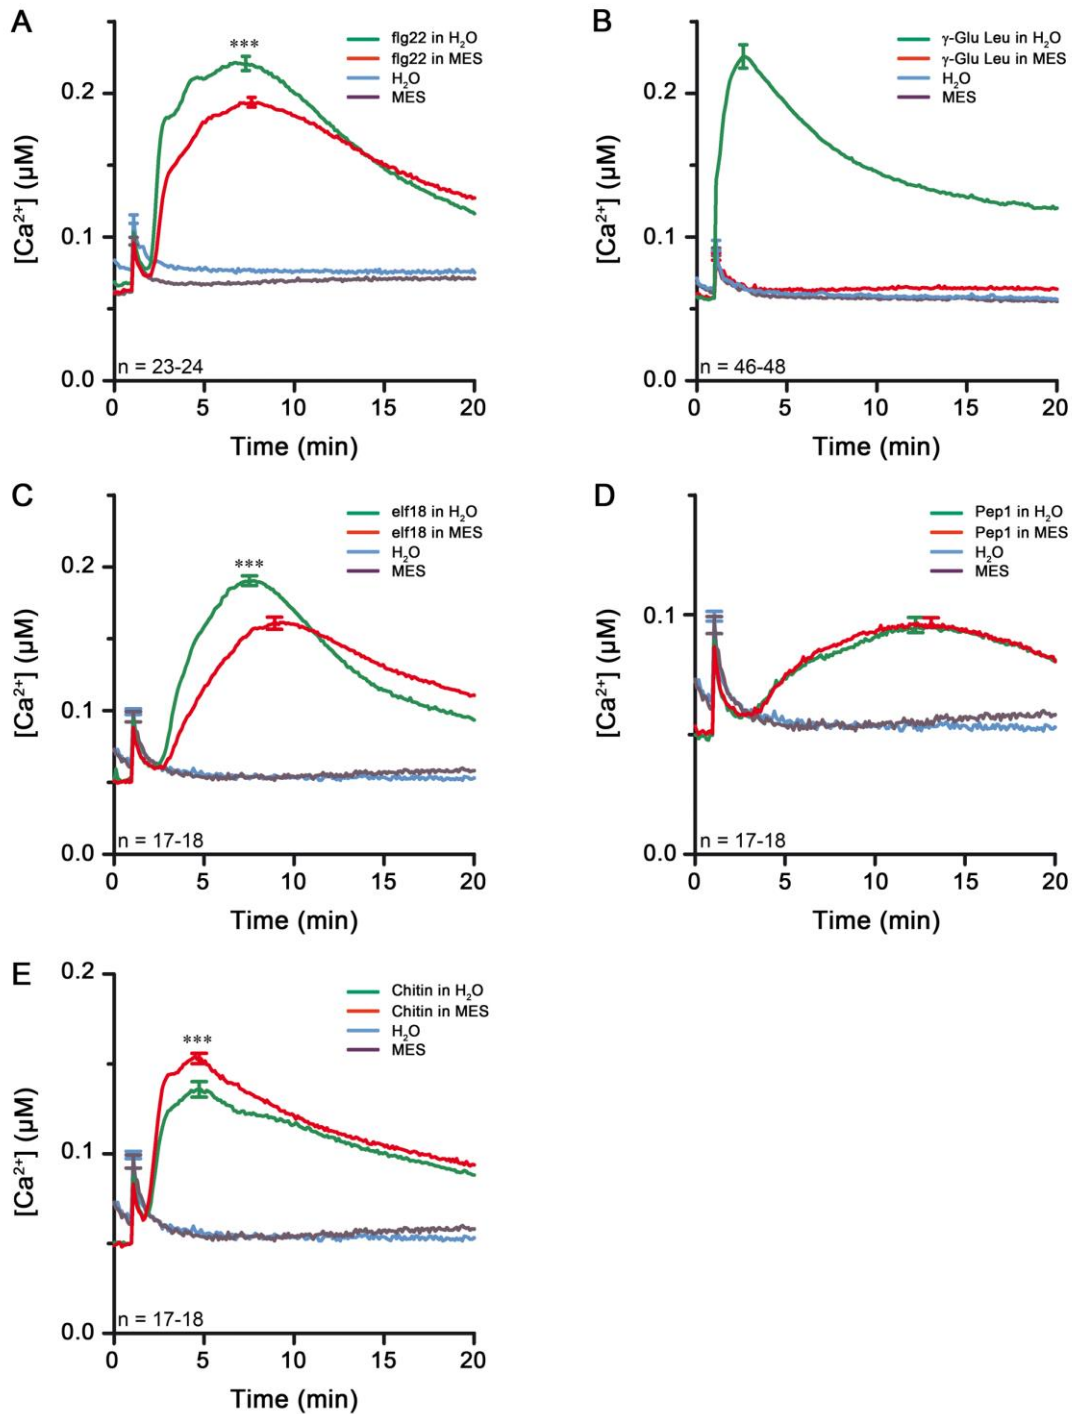

**S9 Fig. MES buffer (pH 6.0) diminishes the  $Ca^{2+}$  response of Arabidopsis pMAQ2 to flg22 and eliminates the response to  $\gamma$ -Glu-Leu.** (A-E) Seedlings were treated with the indicated elicitors dissolved in either water or MES buffer (pH 6.0). Elicitors used were 10 nM flg22 (A), 250 µM  $\gamma$ -Glu-Leu (B), 10 nM elf18 (C), 10 nM AtPep1 (D) and 2 µg shrimp shell/ml (E). Experiments were performed twice (A) four times (B) or three times (C-E) and data were pooled. Error bars represent standard error of the mean. \*\*\* = significant difference ( $P < 0.001$ ) according to Two-way ANOVA with Bonferroni post-test. Note that (B) is replotted using the data from Fig 4A and B.

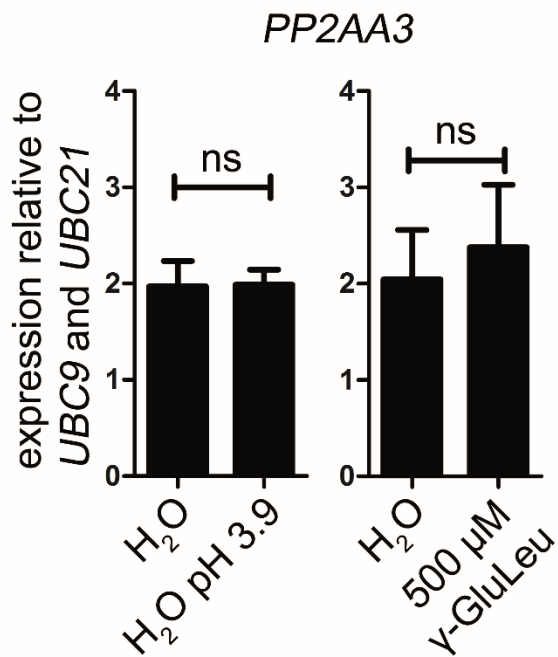

**S10 Fig. qRT-PCR analysis of the influence of  $\gamma$ -Glu-Leu or acidification on *PP2A* expression.** Pools of pMAQ2 seedlings were elicited with water, water adjusted to pH 3.9, or 500  $\mu$ M  $\gamma$ -Glu-Leu for 1 hour. Expression of *PP2AA3* relative to *UBIQUITIN CONJUGATING ENZYME9* and *21* (*UBC9*, *UBC21*) was determined in two independent experiments with 4 seedling pools per treatment and 2 technical replicates per pool. Combined data of both experiments were log-transformed prior to two-tailed Mann-Whitney t-tests; ns = no significant difference.

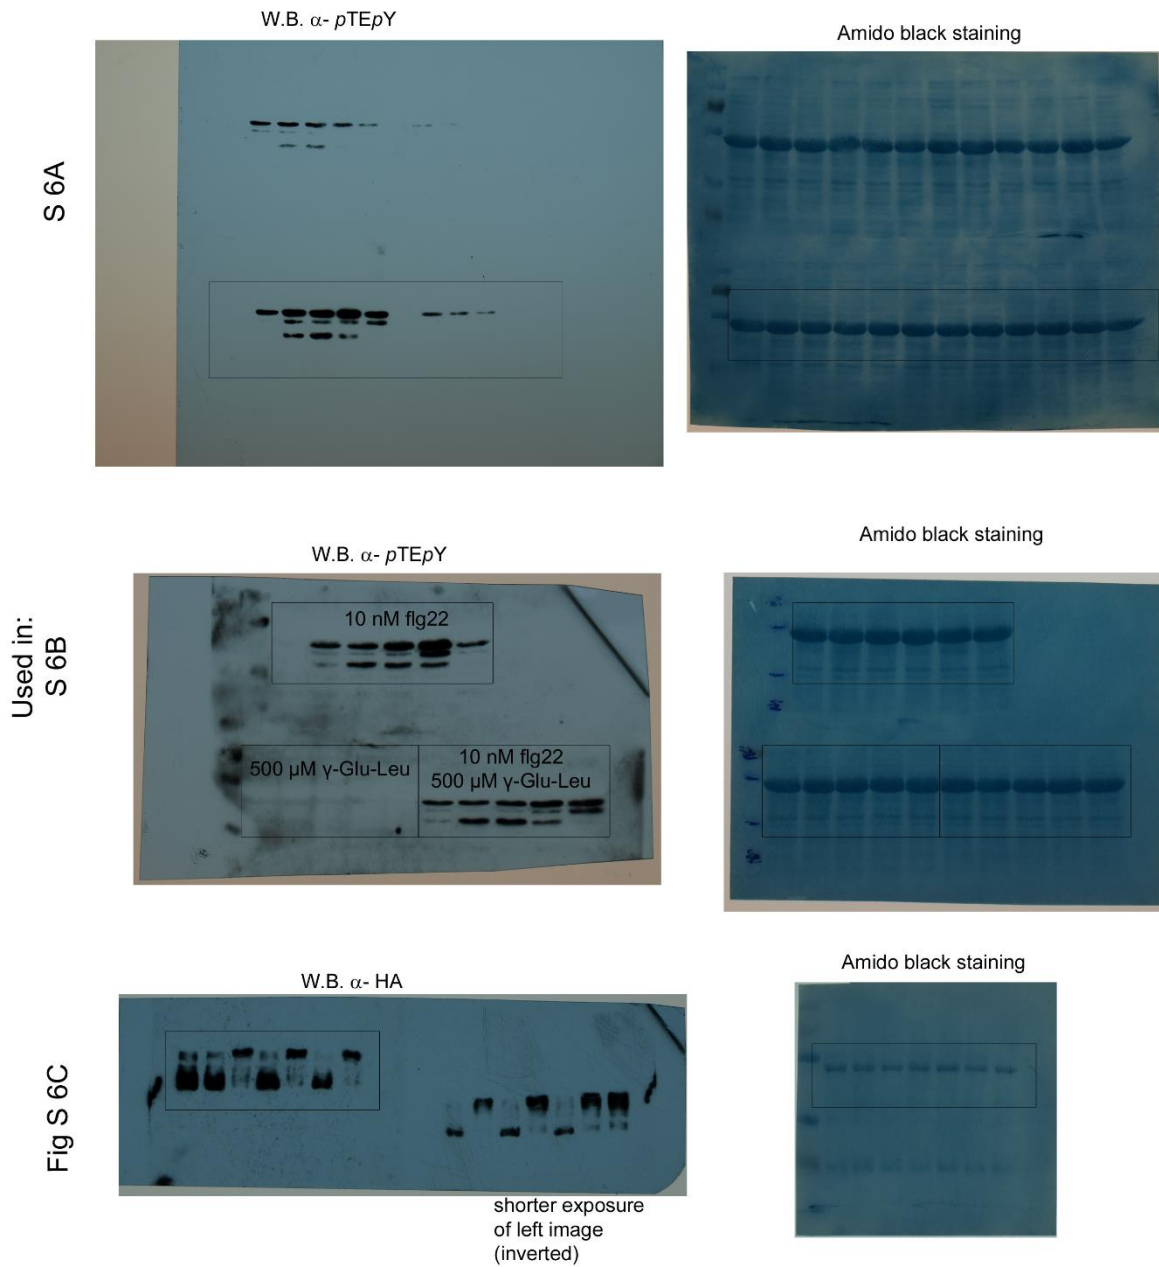

**S11 Fig. The original western blots used to assemble Fig. S6.** The cropped regions used for Fig S6 are framed with boxes. Experimental details and labelling of lanes are described in legend of Fig S6.

**Table S1: Oligonucleotide primers used in qRT-PCR**

| Primer name  | AGI code  | sequence                     |
|--------------|-----------|------------------------------|
| PP2AA3_5     | At1G13320 | gaccggagccaactaggac          |
| PP2AA3_3     |           | aaaacttggtaactttccagca       |
| UBC9_5       | At4G27960 | tcacaattccaaggtgctgc         |
| UBC9_3       |           | tcactggggttggatccgt          |
| UBC21_5      | At5G25760 | cagtctgtgtgtagagctatcatagcat |
| UBC21_3      |           | agaagattccctgagtcgcagtt      |
| ACD11-like_5 | AT4G39670 | gtacatcgccaagggttaagga       |
| ACD11-like_3 |           | tctaggccaagaatggtgtgtaacg    |
| WRKY33_5     | AT2G38470 | gggaaacccaaatccaaga          |
| WRKY33_3     |           | gtttccctcgtaggttga           |
| MPK11_5      | AT1G01560 | gcttctggcatcgtctgtg          |
| MPK11_3      |           | ctcaaagttcttagcgtcgat        |
| MPK3_5       | AT3G45640 | tcaagcttctcgtcatcttga        |
| MPK3_3       |           | tgatttgatgaagatcagtatccatta  |
| NHL10_5      | AT2G35980 | acgccggacagtctagga           |
| NHL10_3      |           | ccctaagcctgaactgatctc        |
| PAD3_5       | AT3G26830 | caccactgatcatctcaaagga       |
| PAD3_3       |           | cggcattccccatagtgtt          |
| PCS1_5       | AT5G44070 | acatatcaccgaggtgtatttaagc    |
| PCS1_3       |           | gccaccaataggtgaaaagtg        |
| FRK1_5       | AT2G19190 | gagactatttggcaggtaaaaggt     |
| FRK1_3       |           | aggaggcttacaaccattgtg        |
| CAD5_3       | AT4G34230 | tgtctctgcttaagcttgatgg       |
| CAD5_5       |           | tgaagctccccgttatcact         |
| WRKY53_5     | AT4G23810 | cggaagtccgagaagtgaag         |
| WRKY53_3     |           | tctgaccactttggtaacatcttt     |
| ZAT12_5      | AT5G59820 | ctttgggaggacacatgagg         |
| ZAT12_3      |           | caaagcgcgtgtaaccaac          |
| PHI1_5       | AT1G35140 | tggatattaccaagggcctaaa       |
| PHI1_3       |           | ccagcataaccaggatacgaa        |
